# Supplementary material for: Accelerated rational PROTAC design via deep learning and molecular simulations
Source: Springer Nature journal article supplement (doi:10.1038/s42256-022-00527-y), 2022-09-15

Compound 1: Fig. 4d

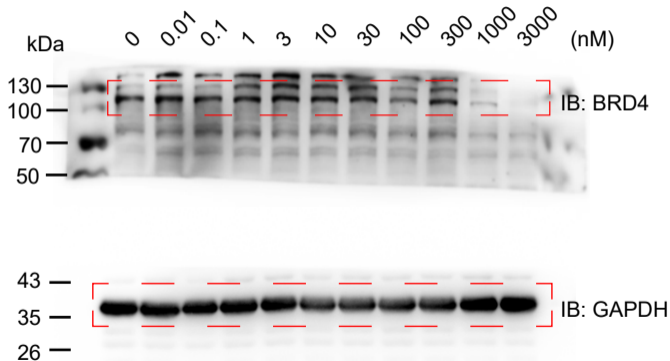

Compound 2: Fig. 4e

0 0.01 0.1 1 3 10 30 100 300 1000 3000 (nM)

kDa  
170 —  
130 —  
100 —  
70 —

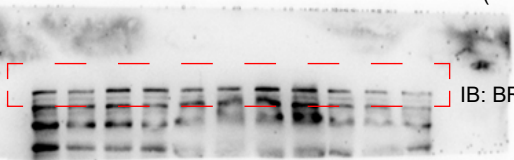

43 —  
35 —  
26 —

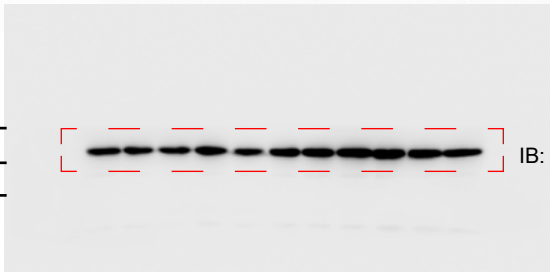

Compound 3: Fig. 4f

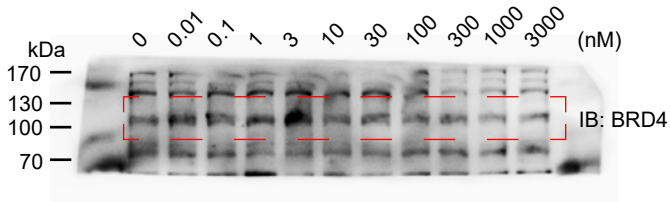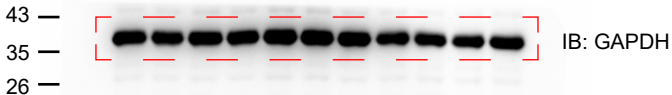

Supplement: 42256_2022_527_MOESM3_ESM.pdf [file 42256_2022_527_MOESM3_ESM.pdf]
